# Supplementary material for: Healthcare burden of pulmonary hypertension owing to lung disease and/or hypoxia
Source: Springer Nature journal article supplement (doi:10.1186/s12890-017-0399-1), 2017-04-10
Supplement: MOESM3 [file 12212988]

### Additional File 3. Annual Per-Patient All-Cause Quartile Medical Costs

| Variable            | Mean   | SD      | Quartile Range |       |        |        |           |
|---------------------|--------|---------|----------------|-------|--------|--------|-----------|
|                     |        |         | Min            | 25%   | 50%    | 75%    | Max       |
| Group 3 PH Patients |        |         |                |       |        |        |           |
| Baseline costs      |        |         |                |       |        |        |           |
| Total pay           | 34,040 | 71,571  | 0              | 5,114 | 10,906 | 30,291 | 1,554,699 |
| Inpatient           | 11,485 | 51,815  | 0              | 0     | 418    | 2,962  | 1,438,619 |
| Outpatient          | 8,429  | 28,357  | -5,934         | 376   | 1,415  | 5,953  | 476,951   |
| Physician office    | 1,655  | 3,599   | 0              | 176   | 611    | 1,929  | 60,816    |
| ED                  | 372    | 1,916   | -7,849         | 0     | 0      | 68     | 51,896    |
| Prescription        | 12,099 | 27,938  | 0              | 1,266 | 3,742  | 8,777  | 466,865   |
| Follow-up costs     |        |         |                |       |        |        |           |
| Total pay           | 44,732 | 104,621 | -5             | 6,704 | 14,230 | 42,420 | 2,205,708 |
| Inpatient           | 15,852 | 84,677  | 0              | 0     | 1,026  | 3,815  | 2,081,403 |
| Outpatient          | 11,875 | 34,344  | 0              | 682   | 2,441  | 9,602  | 543,392   |
| Physician office    | 1,825  | 4,948   | 0              | 182   | 733    | 2,046  | 134,964   |
| ED                  | 385    | 1,894   | -5,230         | 0     | 0      | 74     | 40,440    |
| Prescription        | 14,795 | 29,228  | -464           | 1,495 | 4,414  | 11,521 | 298,874   |
| Control Patients    |        |         |                |       |        |        |           |
| Baseline costs      |        |         |                |       |        |        |           |
| Total pay           | 8,102  | 14,108  | -656           | 2,109 | 4,668  | 8,853  | 267,842   |
| Inpatient           | 1,764  | 8,963   | 0              | 0     | 0      | 1,141  | 196,893   |
| Outpatient          | 2,171  | 5,804   | -1,324         | 65    | 423    | 1,605  | 69,840    |
| Physician office    | 853    | 2,285   | 0              | 56    | 267    | 782    | 64,119    |
| ED                  | 79     | 389     | -1             | 0     | 0      | 0      | 8,577     |
| Prescription        | 3,235  | 4,622   | 0              | 535   | 2,020  | 4,397  | 108,054   |
| Follow-up costs     |        |         |                |       |        |        |           |
| Total pay           | 7,051  | 12,887  | -71            | 1,711 | 3,930  | 8,058  | 316,436   |
| Inpatient           | 1,015  | 4,668   | 0              | 0     | 0      | 228    | 75,284    |
| Outpatient          | 1,908  | 8,281   | -168           | 37    | 315    | 1,159  | 279,228   |
| Physician office    | 816    | 3,001   | 0              | 35    | 237    | 699    | 108,068   |
| ED                  | 113    | 1,471   | 0              | 0     | 0      | 0      | 66,039    |
| Prescription        | 3,198  | 4,371   | 0              | 495   | 1,877  | 4,297  | 58,624    |

Costs were inflated to 2013 US \$ and rounded to closest dollar. Costs reflect fully paid and adjudicated medical claims paid by a third party payer.

PH = pulmonary hypertension; ED = emergency department.
