# Supplementary material for: Healthcare burden of pulmonary hypertension owing to lung disease and/or hypoxia
Source: Springer Nature journal article supplement (doi:10.1186/s12890-017-0399-1), 2017-04-10
Supplement: MOESM4 [file 12212988]

**Additional File 4. Annual Per Patient Respiratory-Related Quartile Medical Costs**

| Variable            | Mean  | SD     | Quartile Range |     |     |       |           |
|---------------------|-------|--------|----------------|-----|-----|-------|-----------|
|                     |       |        | Min            | 25% | 50% | 75%   | Max       |
| Group 3 PH Patients |       |        |                |     |     |       |           |
| Baseline costs      |       |        |                |     |     |       |           |
| Total pay           | 3,405 | 16,246 | 0              | 81  | 472 | 1,715 | 366,976   |
| Inpatient           | 2,181 | 15,301 | 0              | 0   | 0   | 106   | 365,941   |
| Outpatient          | 733   | 2,566  | 0              | 0   | 14  | 366   | 52,201    |
| Physician office    | 156   | 453    | 0              | 0   | 7   | 129   | 11,807    |
| ED                  | 70    | 796    | 0              | 0   | 0   | 0     | 26,024    |
| Follow-up costs     |       |        |                |     |     |       |           |
| Total pay           | 5,089 | 36,980 | 0              | 43  | 493 | 1968  | 1,355,621 |
| Inpatient           | 3,652 | 36,218 | 0              | 0   | 0   | 211   | 1,352,279 |
| Outpatient          | 981   | 2,909  | 0              | 0   | 31  | 529   | 36,876    |
| Physician office    | 148   | 370    | 0              | 0   | 0   | 128   | 6,057     |
| ED                  | 589   | 526    | 0              | 0   | 0   | 0     | 15,580    |
| Control Patients    |       |        |                |     |     |       |           |
| Baseline costs      |       |        |                |     |     |       |           |
| Total pay           | 862   | 2,736  | 0              | 14  | 132 | 791   | 47,521    |
| Inpatient           | 317   | 2,111  | 0              | 0   | 0   | 0     | 47,363    |
| Outpatient          | 240   | 1,194  | -109           | 0   | 0   | 43    | 25,525    |
| Physician office    | 67    | 235    | 0              | 0   | 0   | 42    | 3,895     |
| ED                  | 12    | 112    | 0              | 0   | 0   | 0     | 2,782     |
| Follow-up costs     |       |        |                |     |     |       |           |
| Total pay           | 587   | 2,541  | 0              | 0   | 28  | 353   | 73,896    |
| Inpatient           | 158   | 1,327  | 0              | 0   | 0   | 0     | 36,493    |
| Outpatient          | 176   | 1,762  | -27            | 0   | 0   | 2     | 72,247    |
| Physician office    | 39    | 166    | 0              | 0   | 0   | 10    | 3,876     |
| ED                  | 11    | 114    | 0              | 0   | 0   | 0     | 2,702     |

Costs were inflated to 2013 US \$ and rounded to closest dollar. Costs reflect fully paid and adjudicated medical claims paid by a third party payer.

PH = pulmonary hypertension; ED = emergency department.
